# Supplementary material for: A double-blind randomized study assessing safety and efficacy following one-year adjunctive treatment with bitopertin, a glycine reuptake inhibitor, in Japanese patients with schizophrenia
Source: Springer Nature journal article supplement (doi:10.1186/s12888-016-0778-9), 2016-03-15
Supplement: MOESM1 [file 9748472]

List of the institutional review boards

|                                       |
|---------------------------------------|
| Hino Hospital                         |
| Hinaga General Center for Mental Care |
| Ainohanazono Hospital                 |
| Tanaka Hospital                       |
| Uenohara Hospital                     |
| Kuranari Psychiatric Clinic           |
| Yatsushiro Kosei Hospital             |
| Sapporo Hanazono Hospital             |
| Osaka Psychiatric Medical Center      |
| Okayama Psychiatric Medical Center    |
| Uesugi Clinic                         |
| Nagasaki University Hospital          |
| Mental Support Soyokaze Hospital      |
| Hannan Hospital                       |
| Shinabuyama Hospital                  |
| Kurayoshi Hospital                    |
| Tokushima university Hospital         |
| Kyushu University Hospital            |
| Fujita Kokoro Care Center             |
| Nagasaki Medical Center of Psychiatry |
| Yokohama City University Hospital     |
| Kusatsu Hospital                      |
| Heisei Hospital                       |
| Kyowa Hospital                        |
| Tomita Hospital                       |
| Kamo Seishin Medical Center           |
| Sawa Hospital                         |
| Hiroshima First Hospital              |
| Azumi General Hospital                |
| Tosa Hospital                         |
| Yamamoto Hospital                     |
| Mental Clinic Minami                  |
| Hokuto Clinic Hospital                |
| Kakamigahara Hospital                 |
| Kokorono Clinic Narimasu              |
